# Supplementary material
Source: HighWire-hosted journal article supplement (https://learnmem.cshlp.org/content/suppl/2024/06/11/31.5.a053894)
Supplement: S4-Explanation_of_the_Illustrations.docx [file S4-Explanation_of_the_Illustrations.docx]

Explanation of the Illustrations

General terms

**von Alten, 1910[[1]](#footnote-2) Ito et al., 2014[[2]](#footnote-3)**

C.a Vordere Kommissur - not defined

C.dors Dorsalkommissur superior ellipsoid/arch commissure

Ca.i Innerer Becher (inner) median calyx

Ca.e Äußerer Becher (outer) lateral calyx

Ch.e Chiasma externum/äußere Kreuzung first optic chiasmata of the optic lobe

Ch.m Mittlere Kreuzung second optic chiasmata of the optic lobe

Ch.i Innere Kreuzung -

C.K Zentralkörper central body

F.i.a Fasciculus inferior anterior anterior optic tract

F.s.a Fasciculus superior anterior posterior optic commissure (part)

F.s.p Fasciculus superior posterior posterior optic commissure

Gl.e Globulus externus lateral calyx region

Gl.i Globulus internus median calyx region

Gl.oc Glomerula ocellaria -

Gl.olf Glomerula olfactoria olfactory glomeruli

Kr Kreuzung der Stiele (stalks) bifurcation of the peduncle of the mb

L.olf Lobus olfactorius antennal lobe

L.opt Lobus opticus optic lobe

L.pr Lobus protocerebralis protocerebral lobe

M.m.e. Äußere Markmasse lamina (neuropil)

M.m.i. Innere Markmasse lobula

M.m.m. Mittlere Markmasse medulla

N.a Nervus antennalis antennal nerve

N.oc Nervus ocellaris ocellar nerve

Oc Ocellum ocellus

P.i Pars intercerebralis pars intercerebralis

Po.int Pons intercerebralis protocerebral bridge

P.K Pilzhutförmiger Körper mushroom body (mb)

R.a Radix anterior/vordere Wurzel (root) vertical lobe of the mb

Ret Retina retina

R.i Radix anterior/Innere Wurzel (root) medial lobe of the mb

S.Nbs Subretinale Nervenbündelschicht -

Sp Spaltfurche furrow between calyces

St Stiel (stalk) peduncle

T.opt Tuberculum opticum anterior optic tubercle

Tr Trachee trachea

♀ female or female queen,♂ male or male drone, ☿ female worker

1. von Alten H. Zur Phylogenie des Hymenopterengehirns. Jen Zeitschr f Naturwiss. 1910;46(2/3):511-90. [↑](#footnote-ref-2)
2. Ito K, Shinomiya K, Ito M, Armstrong JD, Boyan G, Hartenstein V, et al. A Systematic Nomenclature for the Insect Brain. Neuron. 2014;81(4):755-65. [↑](#footnote-ref-3)
