# Supplementary material
Source: HighWire-hosted journal article supplement (https://learnmem.cshlp.org/content/suppl/2024/06/11/31.5.a053894)
Supplement: S5-Species_Alten-1910.docx [file S5-Species_Alten-1910.docx]

**Species Names**

von Alten, H. 1910 Zur Phylogenie des Hymenopterengehirns. Jenaische Zeitsc.für Naturw. 46, 511-590

Arthropoda

| Typhlopone (Dorylus helvola) | african driver ant | [**Formicidae**](https://www.antwiki.org/wiki/Formicidae) | Hymenoptera |
| --- | --- | --- | --- |
| Rhizotrogus aestivus | [Blatthornkäfer](https://de.wikipedia.org/wiki/Blatthornk%C3%A4fer) | **Scarabaeidae** | **Coleoptera** |
| Porcellio scaber | rough woodlouse | [**Porcellionidae**](https://en.wikipedia.org/wiki/Porcellionidae) | **Crustacea** |
| Artemia | brine shrimp | **Artemiidae** | **Branchiopoda** |
| Peripatus capensis | velvet worm | [**Peripatopsidae**](https://en.wikipedia.org/wiki/Peripatopsidae) | Onychophora |
| **Lulus (Julus) terrestris** | millipede | **Julidae** | Diplopoda |
| Cossus | goat moths | Cossidae | Lepidoptera |
| Sphinx | hawk moths | Sphingidae | Lepidoptera |
| Vanessa |  | Nymphalidae | Lepidoptera |
| Forficula | earwig | Forficulidae | Dermaptera |
| Acridium | short-horn grasshopper | Acrididae | Orthoptera |
| Acheta | cricket | **Grylloidea** | Orthoptera |
| Gryllotalpa | mole cricket | [**Gryllotalpidae**](https://en.wikipedia.org/wiki/Gryllotalpidae) | Orthoptera |
| Procrustes (Carabus) coriaceus | **leather ground beetle** | Carabidae | Coleoptera |
| Dytiscus | diving beetle | Dytiscidae | Coleoptera |
| Hydrophilus | water scavenger beetle | Hydrophilidae | Coleoptera |

**Hymenoptera**

| **A. Tenthredinidae** |  |  | **Sawflies** |
| --- | --- | --- | --- |
| Tenthredo mesomelaena |  | [Tenthredinidae](https://en.wikipedia.org/wiki/Tenthredinidae" \o ") | Tenthredo mesomela |
| Tenthredo flava |  | [Tenthredinidae](https://en.wikipedia.org/wiki/Tenthredinidae) | Tenthredo campestris |
| Allanthus scrophulariae | Figwort sawfly | [Tenthredinidae](https://en.wikipedia.org/wiki/Tenthredinidae) |  |
| Allanthus arcuatus |  | [Tenthredinidae](https://en.wikipedia.org/wiki/Tenthredinidae) |  |
| Encarsioneura Sturmii |  | [Tenthredinidae](https://en.wikipedia.org/wiki/Tenthredinidae) | Siobla sturmii |
| Tenthredo ribis |  | Tenthredinidae |  |
| B. Cynipidae |  |  | Gall wasps |
| Rhodites rosae Diplolepis | mossy rose gall | [Cynipidae](https://en.wikipedia.org/wiki/Cynipidae) |  |
| **C. Uroceridae (Siricidae)** |  |  | Wood wasps |
| (Uro-) Sirex gigas | Giant woodwasp | [Siricidae](https://en.wikipedia.org/wiki/Siricidae" \o "Siricidae) |  |
| Sirex invencus | Steely-blue wood wasp | [Siricidae](https://en.wikipedia.org/wiki/Siricidae) |  |
| **D. Ichneumonidae** |  |  | **Ichneumon wasps** |
| Ichneumon obsessor |  | [Ichneumonoidea](https://en.wikipedia.org/wiki/Ichneumonoidea) | Ichneumon formosus |
| Exetastes fornicator |  | [Ichneumonoidea](https://en.wikipedia.org/wiki/Ichneumonoidea) |  |
| Aphidius rosarum (rosae) |  | Braconidae |  |
| Cryptus |  | Cryptinae |  |
| Bracon |  | Braconidae | Braconid wasp |
| E. Fossorien (Spheciformes) |  |  |  |
| **a) Fossorien** |  |  | Digger wasps |
| Crabro cribrarius | Slender-bodied digger wasp | Crabronidae |  |
| Cerceris labiata |  | Crabonidae |  |
| Philantinae | European bee wolf | [Crabronidae](https://en.wikipedia.org/wiki/Crabronidae) |  |
| Prosopis | yellow-faced or masked bees | Colletidae | Hylaeus |
| Sphecodes gibbus | Dark-winged blood bee | Halictidae |  |
| **b) Gastrilegidae / Podilegidae** |  |  |  |
| Ceratina | Small carpenter bees | Apidae |  |
| Colletes | Ground-nesting bees | Colletidae |  |
| Xylocopa | Carpenter bee | [Apidae](https://de.wikipedia.org/wiki/Apidae) |  |
| Ceratina cucurbitina | Cucumber small Carpenter | [Apidae](https://de.wikipedia.org/wiki/Apidae) |  |
| Xylocopa violacea | Violet carpenter bee | [Apidae](https://de.wikipedia.org/wiki/Apidae) |  |
| **Gastrilegidae** |  | [Megachilidae](https://de.wikipedia.org/wiki/Bauchsammlerbienen) |  |
| Eriades crenulatus |  | [Megachilidae](https://de.wikipedia.org/wiki/Bauchsammlerbienen) | Heriades crenulatus |
| Osmia cornuta | European orchard bee | [Megachilidae](https://de.wikipedia.org/wiki/Bauchsammlerbienen) |  |
| Chalicodoma muraria |  | [Megachilidae](https://de.wikipedia.org/wiki/Bauchsammlerbienen) | Megachile parietina |
| Megachile lagopode |  | [Megachilidae](https://de.wikipedia.org/wiki/Bauchsammlerbienen) |  |
| Älegachile lagopode |  | [Megachilidae](https://de.wikipedia.org/wiki/Bauchsammlerbienen) | Megachile parietina |
| Rho)danthidium septemdentatum | Red-Resin Bee | [Megachilidae](https://de.wikipedia.org/wiki/Bauchsammlerbienen) | *Rhodanthidium septemdentatum* |
| Anthidium oblongatum | Oblong woolcarder bee | [Megachilidae](https://de.wikipedia.org/wiki/Bauchsammlerbienen) |  |
| **Archipidae** |  |  |  |
| Colletes | Polyester bees | **Colletidae** |  |
| Colletes. davicranus | Plasterer bee | Colletidae | Colletes daviesanus |
| Colletes cunnicularius | Spring mining bee | Colletidae | Colletes cunicularius |
| [Halictidae](https://en.wikipedia.org/wiki/Halictidae) | Sweat bees |  |  |
| Halictus quadristrigatus | Giant Furrow Bee | [Halictidae](https://en.wikipedia.org/wiki/Halictidae) | Pseudapis diversipes |
| Nomia diversipes |  | [Halictidae](https://en.wikipedia.org/wiki/Halictidae) | Eucera curvicornis ? |
| **Systropha curvicornis** |  | [Halictidae](https://en.wikipedia.org/wiki/Halictidae) | **(**Eucera curvicornis |
| **Podilegiden** |  |  | Podilegous bees |
| Andrena albicans |  | Andrenidae | Andrena haemorrhoa |
| Andrena fulva | Tawny mining bee | [Andrenidae](https://en.wikipedia.org/wiki/Andrenidae) |  |
| Andrena carbonaria |  | [Andrenidae](https://en.wikipedia.org/wiki/Andrenidae) |  |
| Andrena apicata | Large Sallow Mining Bee | [Andrenidae](https://en.wikipedia.org/wiki/Andrenidae) |  |
| Eucera longicornis | Long-horned bee | [Apidae](https://de.wikipedia.org/wiki/Apidae) |  |
| Anthophora vulpina |  | [Apidae](https://de.wikipedia.org/wiki/Apidae) | Anthophoraquadrimaculata |
| **c) soziale Apiden** |  | [Apidae](https://de.wikipedia.org/wiki/Apidae) | **Social apidae** |
| Bombus agrorum | Common carder bee |  |  |
| Bombus lapidarius | Red-tailed bumble bee | [Apidae](https://de.wikipedia.org/wiki/Apidae) |  |
| Bombus terrestris | Large earth bumblebee | [Apidae](https://de.wikipedia.org/wiki/Apidae) |  |
| Bombus xanthopus |  | [Apidae](https://de.wikipedia.org/wiki/Apidae) |  |
| Bombus kirbyellus | Arctic bumblebee | [Apidae](https://de.wikipedia.org/wiki/Apidae) |  |
| Bombus hyperborea | [Arctic](https://en.wikipedia.org/wiki/Arctic) [bumblebee](https://en.wikipedia.org/wiki/Bumblebee) | [Apidae](https://de.wikipedia.org/wiki/Apidae) |  |
| d) Schmarotzerbienen |  |  | Cuckoo, Parasitic bees |
| Nomada succincta | Yellow-legged nomad-bee | [Apidae](https://de.wikipedia.org/wiki/Apidae) |  |
| Psithyrus vestalis | Vestal cuckoo bumblebee | [Apidae](https://de.wikipedia.org/wiki/Apidae) | Bombus vestalis |
| **F. Vespidae** |  |  |  |
| Vespa vulgaris | common wasp | Vespidae | Vespula vulgaris |
| Polistes gallica | Paper wasp | Vespidae | Polistes gallicus |
| Vespa crabro | European hornet | Vespidae |  |
| Camponotus herculeanus | Carpenter/Hercules ant | Formicidae |  |
| Protrypoxyliden |  |  |  |
| **Trypoxyliden** | Solitary spider-hunting wasp | Cabronidae | *Trypoxylon* Latr., 1796 |
